# Supplementary material for: Association between genome-wide copy number variation and arsenic-induced skin lesions: a prospective study
Source: PubMed Central journal article supplement (PMC5516382; doi:10.1186/s12940-017-0283-8), 2017-07-18

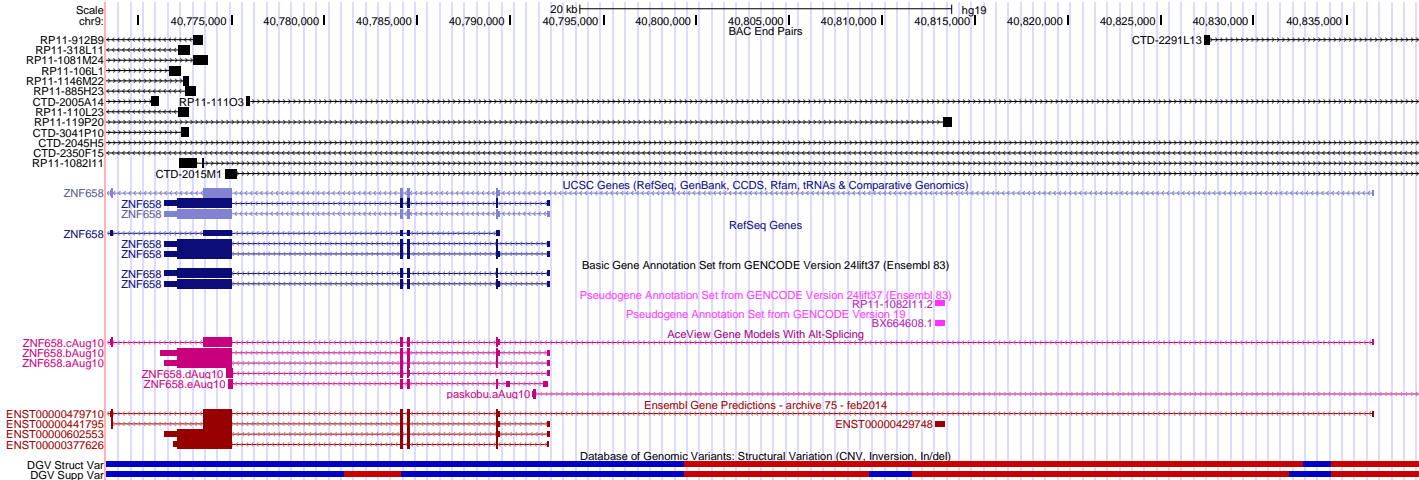

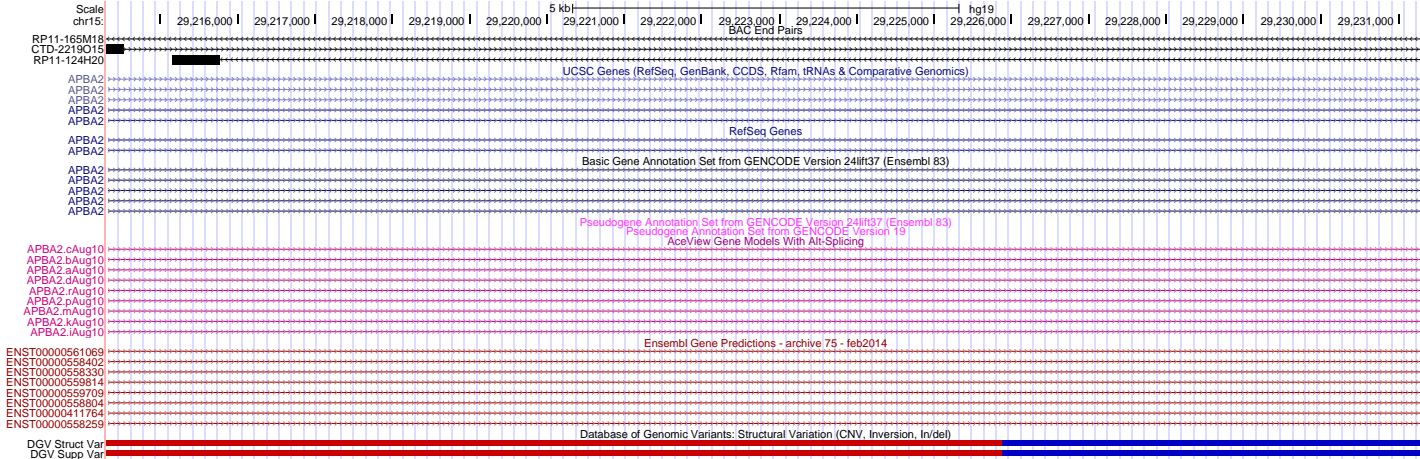

Supplement: 12940_2017_283_MOESM10_ESM.pdf [file 12940_2017_283_MOESM10_ESM.pdf]
