# Supplementary material for: Association between genome-wide copy number variation and arsenic-induced skin lesions: a prospective study
Source: PubMed Central journal article supplement (PMC5516382; doi:10.1186/s12940-017-0283-8), 2017-07-18

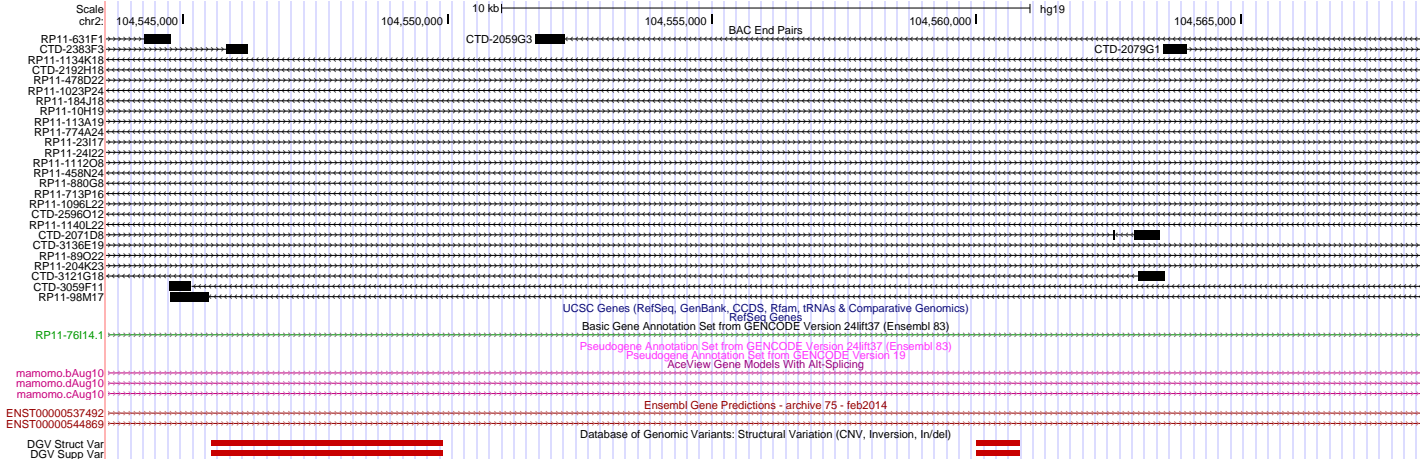

Scale  
chr5:

117,355,000

5 kb

117,360,000

hg19

117,365,000

BAC End Pairs

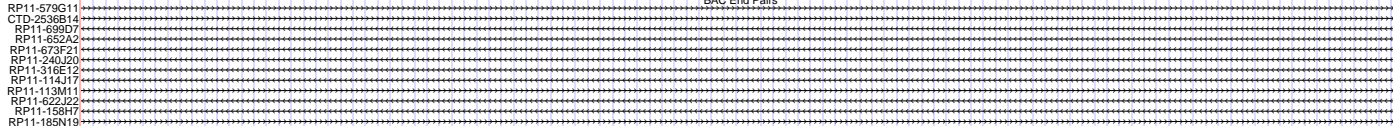

UCSC Genes (RefSeq, GenBank, CCDS, Rfam, tRNAs & Comparative Genomics)  
RefSeq Genes

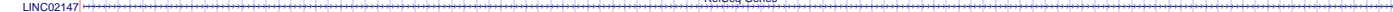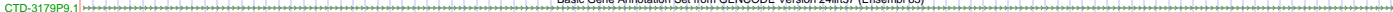

Basic Gene Annotation Set from GENCODE Version 24lift37 (Ensembl 83)

Pseudogene Annotation Set from GENCODE Version 24lift37 (Ensembl 83)

Pseudogene Annotation Set from GENCODE Version 19

AceView Gene Models With Alt-Splicing

Ensembl Gene Predictions - archive 75 - feb2014

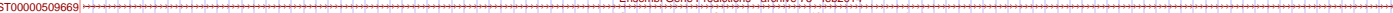

Database of Genomic Variants: Structural Variation (CNV, Inversion, In/del)

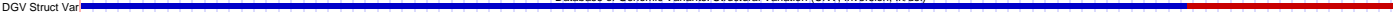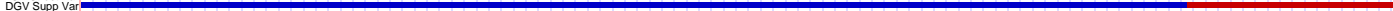

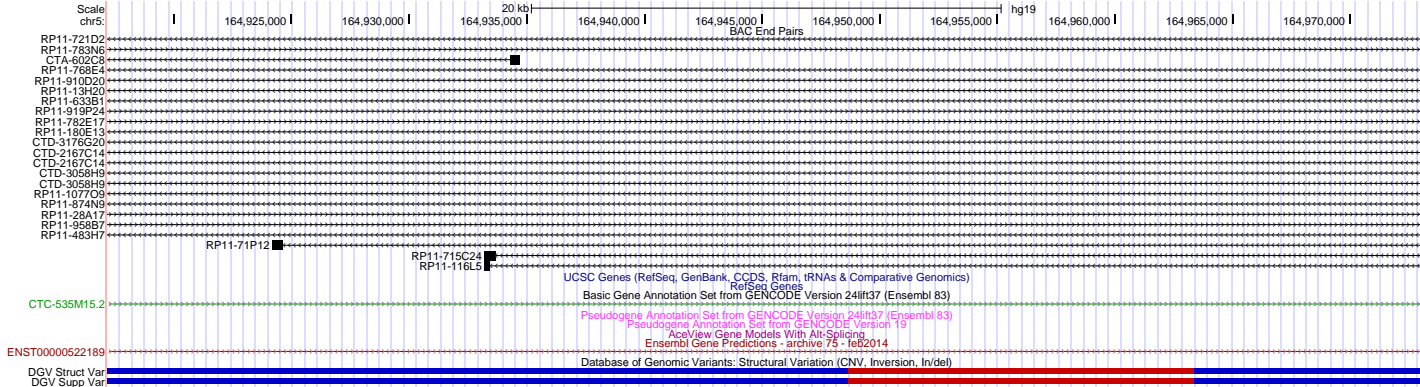

Supplement: 12940_2017_283_MOESM11_ESM.pdf [file 12940_2017_283_MOESM11_ESM.pdf]
